# Supplementary material for: Enhancing the temperature sensitivity of Cr3+ emissions by modification of the host's composition for fluorescence thermometry applications
Source: Royal Society of Chemistry journal article supplement (doi:10.1039/d1dt03480d), 2021-12-02
Supplement: d1dt03480d1.pdf [file d1dt03480d1.pdf]

**Enhancing the temperature sensitivity of Cr<sup>3+</sup> emissions by  
modification of the host composition for fluorescent thermometry  
applications**

Meiling Shi, Leqi Yao, Shijie Yu, Yan Dong, Qiyue Shao\*

*School of Materials Science and Engineering, Jiangsu Key Laboratory for Advanced Metallic*

*Materials, Southeast University, Nanjing 211189, PR China*

\*Corresponding author.

*E-mail address:* qiyueshao@seu.edu.cn (Q. Y. Shao)

**Table S1** Refined crystallographic data of LnAB:0.12Cr<sup>3+</sup>

| Phosphor             | GdAB   | YAB    | LuAB   | (Lu <sub>0.6</sub> Al <sub>0.4</sub> )AB |
|----------------------|--------|--------|--------|------------------------------------------|
| Space group          |        |        | R 32   |                                          |
| a (Å)                | 9.3072 | 9.2879 | 9.2691 | 9.2690                                   |
| b (Å)                | 9.3072 | 9.2879 | 9.2691 | 9.2690                                   |
| c (Å)                | 7.2658 | 7.2406 | 7.2083 | 7.2080                                   |
| V (Å <sup>3</sup> )  | 545.07 | 540.93 | 536.35 | 536.31                                   |
| R <sub>w</sub> p (%) | 5.13   | 9.36   | 9.80   | 11.2                                     |
| R <sub>p</sub> (%)   | 3.64   | 7.78   | 7.82   | 9.63                                     |

**Table S2** Al-O bond lengths in LnAB:0.12Cr<sup>3+</sup>

| Phosphor                                     | Al-O1<br>(Å) | Al-O1<br>(Å) | Al-O2<br>(Å) | Al-O2<br>(Å) | Al-O3<br>(Å) | Al-O3<br>(Å) | Average<br>(Å) |
|----------------------------------------------|--------------|--------------|--------------|--------------|--------------|--------------|----------------|
| GdAB                                         | 1.9300       | 1.9300       | 1.9833       | 1.9833       | 1.8640       | 1.8640       | 1.9258         |
| YAB                                          | 1.9157       | 1.9157       | 1.9586       | 1.9586       | 1.8565       | 1.8565       | 1.9102         |
| LuAB                                         | 1.8794       | 1.8794       | 1.9480       | 1.9480       | 1.7572       | 1.7572       | 1.8615         |
| (Lu <sub>0.6</sub> Al <sub>0.4</sub> )<br>AB | 1.8583       | 1.8583       | 1.9830       | 1.9830       | 1.7249       | 1.7249       | 1.8554         |

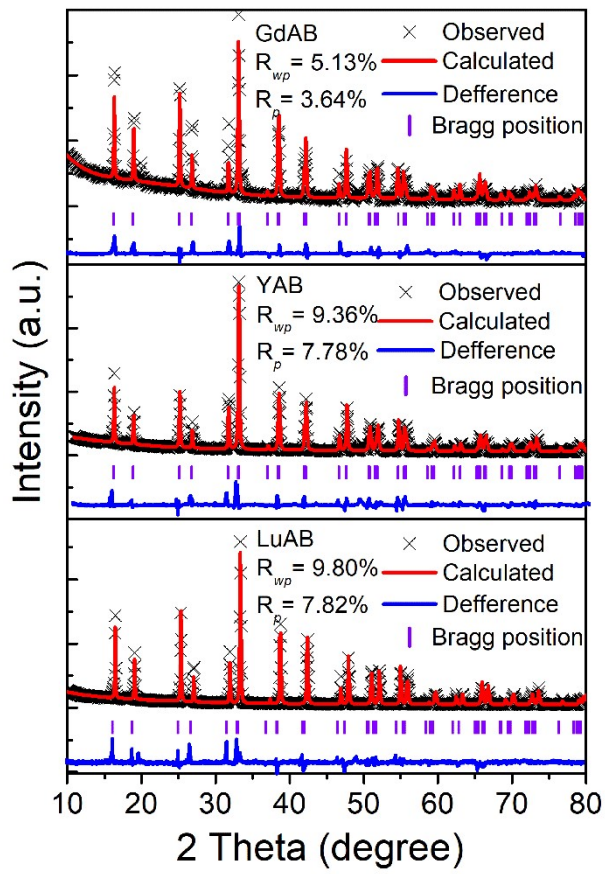

Fig. S1. Rietveld refinements of XRD patterns of LnAB:0.12Cr<sup>3+</sup>.

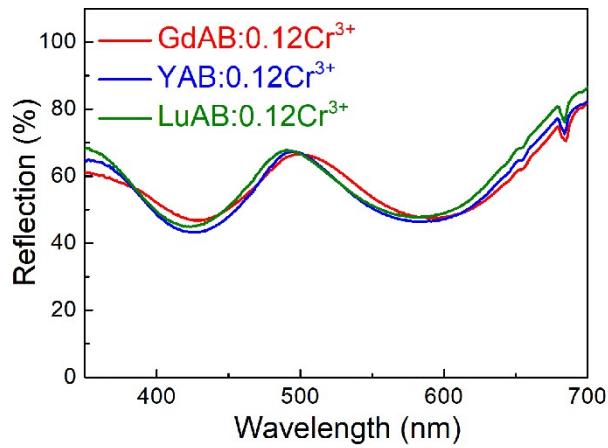

Fig. S2. Diffuse reflection spectra of LnAB:0.12Cr<sup>3+</sup>.

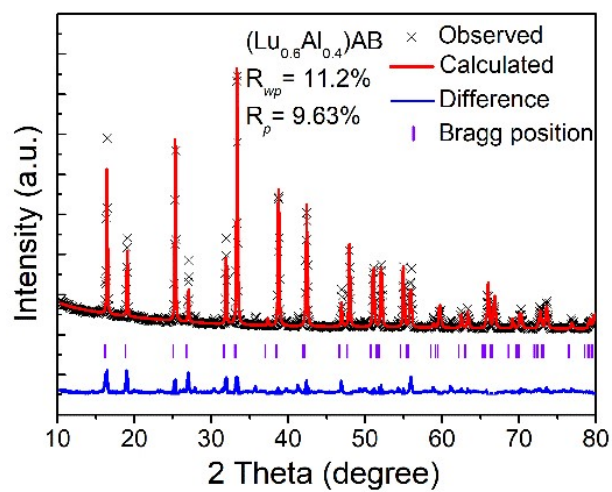

**Fig. S3.** Rietveld refinement of XRD pattern of  $(\text{Lu}_{0.6}\text{Al}_{0.4})\text{AB}:0.12\text{Cr}^{3+}$ .

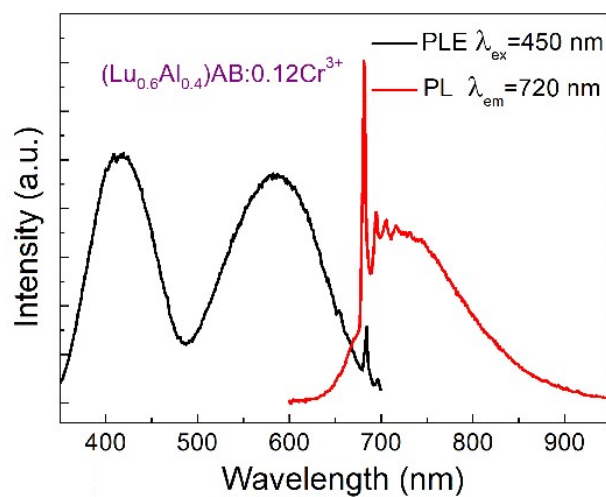

**Fig. S4.** PLE and PL spectra of  $(\text{Lu}_{0.6}\text{Al}_{0.4})\text{AB}:0.12\text{Cr}^{3+}$ .
